# Supplementary material
Source: Springer Nature journal article supplement (https://www.springermedizin.de/resource/supplementary/12885_2011_2768_MOESM6_ESM.pdf/9461898)

**A.i.**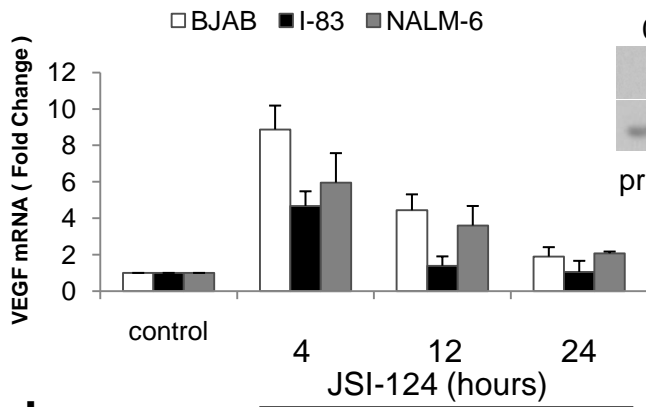**ii.**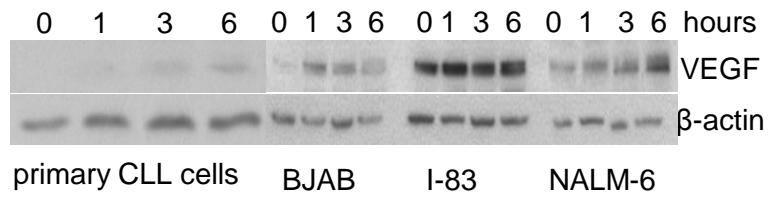**B. i.**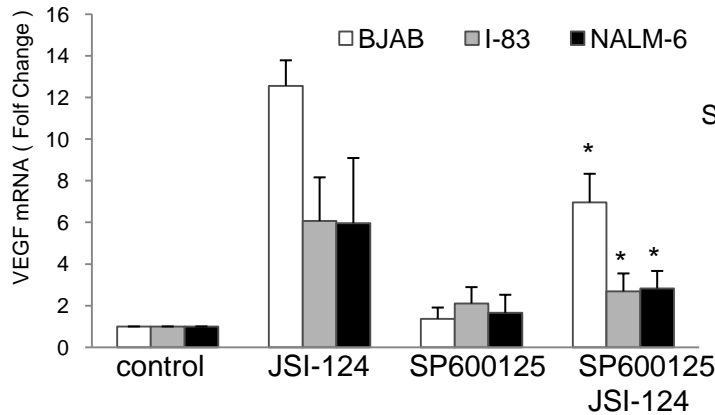**ii.**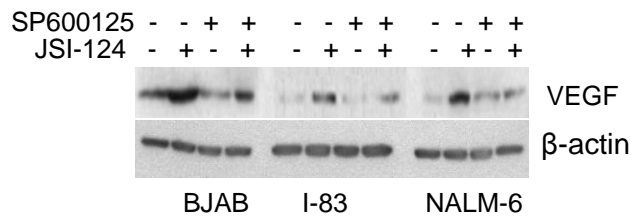**C.i.**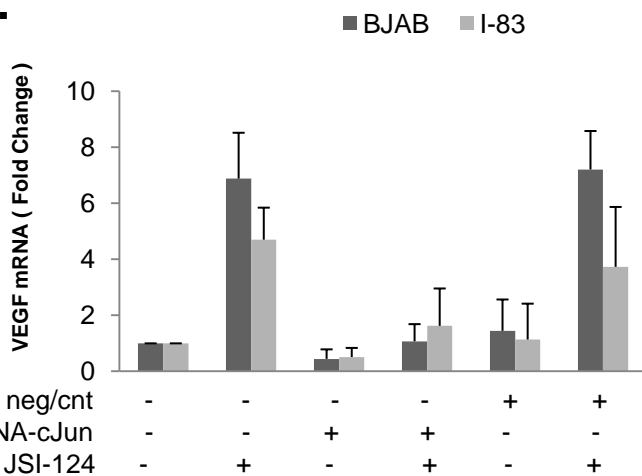**ii.**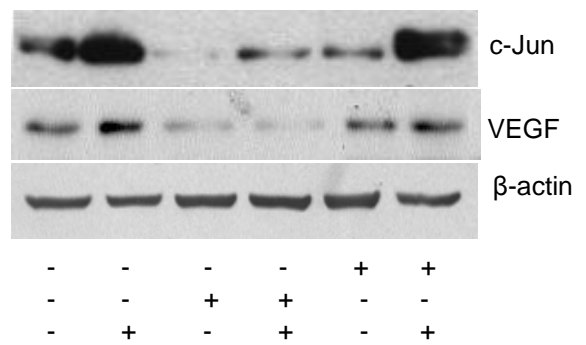**D.**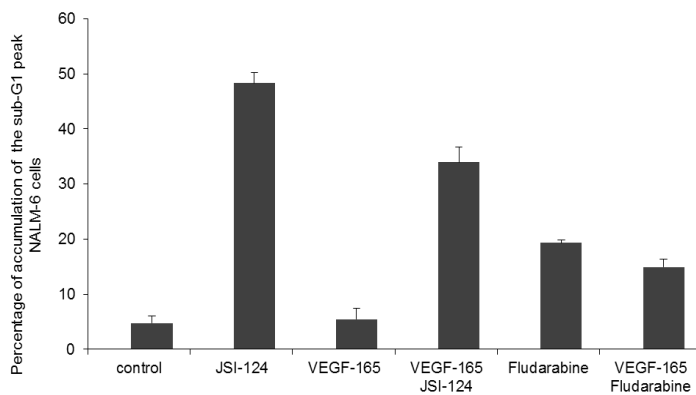

Supplement: MOESM6 [file 9461898]
